# Supplementary material
Source: PubMed Central journal article supplement (PMC4972009)
Supplement: JSLHR-59-302-s001.pdf [file JSLHR-59-302-s001.pdf]

**Supplemental Text.** Stimuli by Condition for the Sentence Repetition Task, With Number of Functional Verb Units (FVUs)

*Short Argument Sentences*

1. The worker carved the wood with his knife but denied the evidence. (2)
2. The widow painted the shed and frightened the mice with her hammer. (2)
3. The president urged the army to act and blocked their concerns. (2)
4. The observer located the park and taught the kids the method. (2)
5. The soprano played the passage and read the joke to the public. (2)
6. The professor assigned the woman the verse to check her vision. (2)
7. Our grandmother injured her thumb yet knit our mother new linen.(2)
8. My brother studied the item then filled the bowl with liquid.(2)
9. This generation tempted sin and grasped success with both hands.(2)
10. My cousin ate an orange and inserted the seeds in sand. (2)
11. The principal saddened the child but coaxed him into class.(2)
12. The dentist baked her assistant a cake and added a cherry. (2)

*Long Argument Sentences*

13. The gentleman amused the earl with his description and impressed his servant but his cat frightened the mouse.(3)
14. The navy crushed the resistance and chased the enemy then guarded the republic with heavy guns.(3)
15. Management chose a plan and excited loyalty but entertained the executives with concerts. (3)
16. The amateur chopped the stump with an axe while professionals estimated his ability. (2)
17. The teacher typed his welcome and drew a village with chalk then shut his eyes and designed his lecture. (4)
18. The graduates delighted in the trip but annoyed my aunt while the minister adjusted the tent. (3)
19. The school required a loan and asked their banker for a note but the executive required assurance. (3)
20. The girl mentioned the crime and expected an exception so the company attacked the evidence. (3)
21. My grandfather added the stables and paid for the ferry but accepted assistance from the men. (3)
22. Our candidate invited the nation to a fight but lost the primary and conceded defeat.(3)
23. The committee allowed the amateur a fight but covered his flesh and emphasized good judgment. (3)
24. Management praised the vision and permitted an exception but the company shut the gallery. (3)

*Short Adjunct Sentences*

25. The genius realized the date at dawn and wrote in the cold. (2)
26. My patient protested in the bath and dripped down the long hall. (2)
27. The queen visited before the judgment but prayed at great length.(2)
28. People hurried at the accident but crumbled at the main square. (2)
29. The author cheated the agency at first and bragged in public. (2)
30. The dog struggled in the pet motel and jumped at the signal.(2)
31. The staff tired before the farewell and complained in the cellar. (2)
32. The driver rushed for the fat priest but crashed on the dreaded curve.(2)
33. Our guide worried at the emergency but decided later. (2)
34. The specialist froze at the call then replied in confusion.(2)
35. The competition melted at our strength but rose after the snub. (2)
36. The corporal flew at noon over the sound and drove in a rush. (2)

*Long Adjunct Sentences*

37. The student sailed for miles on the ocean but drifted to the west while his brother sang quietly. (3)
38. The physician proposed a cure in his statement but his patient swore at the complication.(2)
39. My uncle disclosed the scheme during the call but the company cheated as usual at the port. (2)
40. Congress attempted the deal in the winter but objected after the primaries and revolted. (3)
41. The government refused the drugs from the border base but the army swayed after the clash at the harbor. (2)
42. The lady confessed in a whisper after the trial while the household grieved in the afternoon at church.(2)
43. The natives waited at the platform while the military marched by in respect after the concert. (2)
44. The secretary disclosed the bet in the afternoon and still raced the next morning at the brick track. (2)
45. The beauty dreamed of romance during vacation but her family moved after the church holiday. (2)
46. The soldier rotated to a new danger in the summer and walked for the season without a coat. (2)
47. Council declared its purpose despite the emotion and concluded construction after the election. (2)
48. The couple confided a breakdown in the spring and surrendered their house in the valley after the split. (2)
